# 1 Transdiagnostic alterations in white matter microstructure associated 2 with suicidal thoughts and behaviours in the ENIGMA Suicidal Thoughts 3 and Behaviours consortium 4

5 Running title: White matter microstructure and suicidality  
6

## 7 Authors:

8 Laura S. van Velzen<sup>1,2</sup>, Lejla Colic<sup>3,4,5</sup>, Zuriel Ceja<sup>6,7</sup>, Maria R. Dauvermann<sup>8,9</sup>, Luca M. Villa<sup>3</sup>,  
9 Hannah S. Savage<sup>2,10</sup>, Yara J. Toenders<sup>1,2,11</sup>, Niousha Dehestani<sup>10,12</sup>, Alyssa H. Zhu<sup>13</sup>, Adrian I.  
10 Campos<sup>14</sup>, Lauren E. Salminen<sup>13</sup>, Ingrid Agartz<sup>15,16,17</sup>, Nina Alexander<sup>18,50</sup>, Rosa Ayesa-Arriola<sup>19</sup>,  
11 Elizabeth D. Ballard<sup>20</sup>, Nerisa Banaj<sup>21</sup>, Carlotta Barkhau<sup>22</sup>, Zeynep Başgöze<sup>24</sup>, Jochen Bauer<sup>23</sup>,  
12 Francesco Benedetti<sup>25</sup>, Klaus Berger<sup>26</sup>, Bianca Besteher<sup>4,5</sup>, Katharina Brosch<sup>18,50,86</sup>, Manuel Canal-  
13 Rivero<sup>27,28</sup>, Simon Cervenka<sup>17,29</sup>, Romain Colle<sup>30</sup>, Colm G. Connolly<sup>31</sup>, Emmanuelle Corruble<sup>30</sup>,  
14 Philippe Courtet<sup>32,33</sup>, Baptiste Couvy-Duchesne<sup>34,35</sup>, Benedicto Crespo-Facorro<sup>27,28,36</sup>, Kathryn R  
15 Cullen<sup>24</sup>, Udo Dannlowski<sup>22</sup>, Jeremy Deverduin<sup>37,38</sup>, Ana M. Diaz-Zuluaga<sup>87,88</sup>, Lorielle M.F. Dietze<sup>39</sup>,  
16 Jennifer W Evans<sup>20</sup>, Negar Fani<sup>40</sup>, Kira Flinkenflügel<sup>22</sup>, Naomi P. Friedman<sup>41</sup>, Ian H. Gotlib<sup>42</sup>, Nynke  
17 A. Groenewold<sup>43</sup>, Dominik Grotegerd<sup>22</sup>, Tomas Hajek<sup>39</sup>, Alexander S. Hatoum<sup>44</sup>, Marco  
18 Hermesdorf<sup>26</sup>, Ian B. Hickie<sup>89</sup>, Yoshiyuki Hirano<sup>90,91</sup>, Tiffany C. Ho<sup>92,93</sup>, Yuki Ikemizu<sup>90,94</sup>, Frank  
19 Iorfino<sup>89</sup>, Jonathan C. Ipser<sup>43</sup>, Yuko Isobe<sup>90,91</sup>, Andrea P. Jackowski<sup>45,46</sup>, Fabrice Jollant<sup>47,48,49,30</sup>, Tilo  
20 Kircher<sup>18,50</sup>, Melissa Klug<sup>22</sup>, Sheri-Michelle Koopowitz<sup>43</sup>, Anna Kraus<sup>22</sup>, Axel Krug<sup>18,51</sup>, Emmanuelle  
21 Le Bars<sup>37,38</sup>, Elisabeth J. Leehr<sup>22</sup>, Meng Li<sup>4,5</sup>, Elizabeth T.C. Lippard<sup>52,53</sup>, Carlos Lopez-Jaramillo<sup>88</sup>,  
22 Ivan I. Maximov<sup>15,54</sup>, Andrew M. McIntosh<sup>55</sup>, Katie A. McLaughlin<sup>56,57</sup>, Sean R. McWhinney<sup>39</sup>,  
23 Susanne Meinert<sup>22,58</sup>, Elisa Melloni<sup>25</sup>, Philip B. Mitchell<sup>59</sup>, Benson Mwangi<sup>60,95</sup>, Igor Nenadić<sup>18,50</sup>,  
24 Stener Nerland<sup>15,16</sup>, Emilie Olie<sup>32,33</sup>, Victor Ortiz-García de la Foz<sup>19</sup>, Pedro M. Pan<sup>46</sup>, Fabricio  
25 Pereira<sup>61,62</sup>, Fabrizio Piras<sup>21</sup>, Federica Piras<sup>21</sup>, Sara Poletti<sup>25</sup>, Andrew E. Reineberg<sup>63</sup>, Gloria  
26 Roberts<sup>59</sup>, Rafael Romero-García<sup>9,27</sup>, Matthew D. Sacchet<sup>64</sup>, Giovanni A. Salum<sup>65,66</sup>, Anca-Larisa  
27 Sandu<sup>67</sup>, Carl M. Sellgren<sup>17,68</sup>, Eiji Shimizu<sup>90,91,94</sup>, Harry R. Smolker<sup>69</sup>, Jair C. Soares<sup>60,95</sup>,  
28 Gianfranco Spalletta<sup>21,70</sup>, J. Douglas Steele<sup>71</sup>, Frederike Stein<sup>18,50</sup>, Dan J. Stein<sup>72</sup>, Benjamin  
29 Straube<sup>18,50</sup>, Lea Teutenberg<sup>18,50</sup>, Florian Thomas-Odenthal<sup>18,50</sup>, Paula Usemann<sup>18,50</sup>, Romain  
30 Valabregue<sup>73,74</sup>, Johanna Valencia-Echeverry<sup>88</sup>, Gerd Wagner<sup>4,75</sup>, Gordon Waiter<sup>67</sup>, Martin  
31 Walter<sup>4,5,76,77</sup>, Heather C. Whalley<sup>55,78</sup>, Mon-Ju Wu<sup>60,95</sup>, Tony T. Yang<sup>79</sup>, Carlos A. Zarate<sup>20</sup>, Andre  
32 Zugman<sup>80</sup>, Giovana B. Zunta-Soares<sup>60,95</sup>, Kees van Heeringen<sup>96</sup>, Sanne J.H. van Rooij<sup>40</sup>, Nic van  
33 der Wee<sup>81,82</sup>, Steven van der Werf<sup>81,82</sup>, Paul M. Thompson<sup>13</sup>, Hilary P. Blumberg<sup>3,83,84</sup>, Anne-Laura  
34 van Harmelen<sup>9,85</sup>, Miguel E. Rentería<sup>6,7</sup>, Neda Jahanshad<sup>13</sup>, ENIGMA Suicidal Thoughts and  
35 Behaviours Consortium\* and Lianne Schmaal<sup>1,2</sup>

## 36 Affiliations:

37 <sup>1</sup> Orygen, Parkville, VIC, Australia  
38 <sup>2</sup> Centre for Youth Mental Health, University of Melbourne, Melbourne, VIC, Australia  
39 <sup>3</sup> Department of Psychiatry, Yale University School of Medicine, New Haven, CT, USA  
40 <sup>4</sup> Department of Psychiatry and Psychotherapy, Jena University Hospital, Jena, Germany  
41 <sup>5</sup> DZPG (German Center for Mental Health), partner site Halle/Jena/Magdeburg  
42 <sup>6</sup> QIMR Berghofer Medical Research Institute, Brisbane, QLD, Australia  
43 <sup>7</sup> School of Biomedical Sciences, Faculty of Medicine, The University of Queensland, Brisbane, QLD,  
44 Australia  
45 <sup>8</sup> Institute for Mental Health, School of Psychology, University of Birmingham, Birmingham, UK  
46 <sup>9</sup> Department of Psychiatry, University of Cambridge, Cambridge, UK  
47 <sup>10</sup> Melbourne Neuropsychiatry Centre, Department of Psychiatry, The University of Melbourne, Victoria,  
48 Australia  
49 <sup>11</sup> Department of Psychology, Education and Child Studies, Erasmus University Rotterdam, the Netherlands  
50 <sup>12</sup> School of Psychology, Deakin University, Victoria, Australia  
51 <sup>13</sup> Imaging Genetics Center, Mark and Mary Stevens Neuroimaging and Informatics Institute, Keck School of  
52 Medicine, University of Southern California, Marina del Rey, CA, USA  
53 <sup>14</sup> Regenon Genetics Center, Tarrytown, NY, USA  
54 <sup>15</sup> Norwegian Centre for Mental Disorders Research (NORMENT), Institute of Clinical Medicine, University of  
55 Oslo, Oslo, Norway

- 56 <sup>16</sup> Department of Psychiatric Research, Diakonhjemmet Hospital, Oslo, Norway
- 57 <sup>17</sup> Centre for Psychiatry Research, Department of Clinical Neuroscience, Karolinska Institutet, & Stockholm
- 58 Health Care Services, Region Stockholm, Stockholm, Sweden
- 59 <sup>18</sup> Department of Psychiatry and Psychotherapy, University of Marburg, Marburg, Germany
- 60 <sup>19</sup> Department of Psychiatry. Marqués de Valdecilla University Hospital, IDIVAL, School of Medicine,
- 61 University of Cantabria, Santander, Spain
- 62 <sup>20</sup> Experimental Therapeutics and Pathophysiology Branch, National Institute of Mental Health, National
- 63 Institutes of Health, Bethesda MD, USA
- 64 <sup>21</sup> Laboratory of Neuropsychiatry, Clinical Neuroscience and Neurorehabilitation Department, Santa Lucia
- 65 Foundation IRCCS, Rome, Italy
- 66 <sup>22</sup> Institute for Translational Psychiatry, University of Münster, Münster, Germany
- 67 <sup>23</sup> Clinic for Radiology, University Hospital Münster, Münster, Germany
- 68 <sup>24</sup> Department of Psychiatry and Behavioral Sciences, University of Minnesota Medical School, Minneapolis,
- 69 MN, USA
- 70 <sup>25</sup> Division of Neuroscience, Psychiatry and Psychobiology Unit, IRCCS San Raffaele Scientific Institute,
- 71 Milan, Italy
- 72 <sup>26</sup> Institute of Epidemiology and Social Medicine, University of Münster, Münster, Germany
- 73 <sup>27</sup> Instituto de Biomedicina de Sevilla (IBiS)/HUVR/CSIC/Universidad de Sevilla. CIBERSAM (ISCIII)
- 74 <sup>28</sup> Mental Health Service, Hospital Universitario Virgen del Rocío, Sevilla, Spain
- 75 <sup>29</sup> Department of Medical Sciences, Psychiatry, Uppsala University, Uppsala, Sweden
- 76 <sup>30</sup> MOODS Team, INSERM 1018, CESP, Université Paris-Saclay, Faculté de Médecine Paris-Saclay,
- 77 Service Hospitalo-Universitaire de Psychiatrie de Bicêtre, Assistance Publique-Hôpitaux de Paris, Hôpitaux
- 78 Universitaires Paris-Saclay, Hôpital de Bicêtre, Le Kremlin Bicêtre, F-94275, France
- 79 <sup>31</sup> Department of Biomedical Sciences, Florida State University, Tallahassee, FL
- 80 <sup>32</sup> Department of Emergency Psychiatry and Acute Care, Lapeyronie Hospital, CHU Montpellier, Montpellier,
- 81 France
- 82 <sup>33</sup> IGF, Univ. Montpellier, CNRS, INSERM, Montpellier, France
- 83 <sup>34</sup> Institute for Molecular Bioscience, the University of Queensland, St Lucia, QLD, Australia
- 84 <sup>35</sup> Sorbonne University, Paris Brain Institute - ICM, CNRS, Inria, Inserm, AP-HP, Hôpital de la Pitié
- 85 Salpêtrière, F-75013, Paris, France
- 86 <sup>36</sup> Centro de Investigación Biomédica en Red de Salud Mental, Instituto de Salud Carlos III (CIBERSAM),
- 87 Madrid, Spain
- 88 <sup>37</sup> Institut d'Imagerie Fonctionnelle Humaine, I2FH, Department of Neuroradiology, Gui de Chauliac Hospital
- 89 and University of Montpellier, Montpellier, France
- 90 <sup>38</sup> Department of Neuroradiology, Gui de Chauliac Hospital and University of Montpellier, Montpellier, France
- 91 <sup>39</sup> Department of Psychiatry, Dalhousie University, Halifax, NS, Canada
- 92 <sup>40</sup> Department of Psychiatry and Behavioral Sciences, Emory University, Atlanta, Georgia, USA
- 93 <sup>41</sup> Institute for Behavioral Genetics and Department of Psychology and Neuroscience, University of Colorado
- 94 Boulder, Boulder, CO, USA
- 95 <sup>42</sup> Department of Psychology, Stanford University, Stanford, CA 94305 USA
- 96 <sup>43</sup> Department of Psychiatry & Neuroscience Institute, University of Cape Town, Cape Town, South Africa
- 97 <sup>44</sup> Department of Psychological & Brain Sciences, Washington University in St. Louis
- 98 <sup>45</sup> Østfold University College Department of Education, ICT and Learning, Halden, Norway
- 99 <sup>46</sup> Universidade Federal de São Paulo, Brazil
- 100 <sup>47</sup> Faculty of medicine, University Paris-Saclay & Bicetre hospital, APHP, Le Kremlin-Bicetre, France
- 101 <sup>48</sup> Department of psychiatry, CHU Nîmes, Nîmes, France
- 102 <sup>49</sup> Department of psychiatry, McGill University, Montreal, Canada
- 103 <sup>50</sup> Center for Mind, Brain, and Behavior (CMBB), University of Marburg, Marburg, Germany
- 104 <sup>51</sup> Department of Psychiatry, University Hospital Bonn, Bonn, Germany
- 105 <sup>52</sup> Department of Psychiatry and Behavioral Sciences, Dell Medical School, University of Texas at Austin
- 106 University of Texas at Austin
- 107 <sup>54</sup> Department of Health and Functioning, Western Norway University of Applied Sciences, Bergen, Norway
- 108 <sup>55</sup> Division of Psychiatry, Centre for Clinical Brain Sciences, University of Edinburgh, Edinburgh, United
- 109 Kingdom
- 110 <sup>56</sup> Ballmer Institute for Children's Behavioral Health, University of Oregon
- 111 <sup>57</sup> Department of Psychology, Harvard University
- 112 <sup>58</sup> Institute for Translational Neuroscience, University of Münster, Münster, Germany
- 113 <sup>59</sup> Discipline of Psychiatry and Mental Health, School of Clinical Medicine, University of New South Wales,
- 114 Sydney, Australia
- 115 <sup>60</sup> Louis A. Faillace, MD, Department of Psychiatry and Behavioral Sciences, McGovern Medical School, The
- 116 University of Texas Health Science Center at Houston
- 117 <sup>61</sup> MIPA, Université de Nîmes, Nîmes, France
- 118 <sup>62</sup> Division for clinical research and innovation, University Hospital Center of Nîmes, Nîmes, France

- 119 <sup>63</sup> Institute for Behavioral Genetics, University of Colorado Boulder, Boulder, CO, USA  
120 <sup>64</sup> Meditation Research Program, Department of Psychiatry, Massachusetts General Hospital, Harvard  
121 Medical School, Boston, MA, USA  
122 <sup>65</sup> Child Mind Institute, New York  
123 <sup>66</sup> Universidade Federal do Rio Grande do Sul, Hospital de Clinicas de Porto Alegre - Porto Alegre, Brazil  
124 <sup>67</sup> Aberdeen Biomedical Imaging Centre, University of Aberdeen, Aberdeen, UK  
125 <sup>68</sup> Department of Physiology and Pharmacology, Karolinska Institutet, Stockholm, Sweden  
126 <sup>69</sup> Institute for Cognitive Science, University of Colorado Boulder, Boulder, CO, USA  
127 <sup>70</sup> Menninger Department of Psychiatry and Behavioral Sciences, Baylor College of Medicine, Houston, TX,  
128 USA  
129 <sup>71</sup> Division of Imaging Science and Technology, Medical School, University of Dundee, Dundee UK  
130 <sup>72</sup> SAMRC Unit on Risk & Resilience in Mental Disorders, Department of Psychiatry & Neuroscience Institute,  
131 University of Cape Town  
132 <sup>73</sup> Institut du Cerveau et de la Moelle épinière, ICM, Inserm U 1127, CNRS UMR 7225, Sorbonne Université,  
133 Paris, France  
134 <sup>74</sup> Centre de Neuro-Imagerie de Recherche, CENIR, ICM, Paris, France  
135 <sup>75</sup> Center for Intervention and Research on adaptive and maladaptive brain Circuits underlying mental health  
136 (C-I-R-C), Jena-Magdeburg-Halle, Jena, Germany.  
137 <sup>76</sup> Department of Psychiatry and Psychotherapy, University Tübingen, Tübingen, Germany  
138 <sup>77</sup> Leibniz Institute for Neurobiology, Magdeburg, Germany  
139 <sup>78</sup> Generation Scotland, Centre for Genomic and Experimental Medicine, Institute of Genetics and Molecular  
140 Medicine, University of Edinburgh, Edinburgh, United Kingdom  
141 <sup>79</sup> Department of Psychiatry and Behavioral Sciences, Division of Child and Adolescent Psychiatry, Weill  
142 Institute for Neurosciences, University of California San Francisco, San Francisco, California, USA  
143 <sup>80</sup> National Institute of Mental Health, National Institutes of Health, Bethesda, Maryland  
144 <sup>81</sup> Department of Psychiatry, Leiden University Medical Center, Leiden, The Netherlands  
145 <sup>82</sup> Leiden Institute for Brain and Cognition. Leiden University Medical Center, Leiden, The Netherlands  
146 <sup>83</sup> Department of Radiology and Biomedical Imaging, Yale University School of Medicine, New Haven, CT,  
147 USA  
148 <sup>84</sup> Child Study Center, Yale School of Medicine, New Haven, CT, USA  
149 <sup>85</sup> Education and Child Studies, Leiden University, Leiden, the Netherlands  
150 <sup>86</sup> Institute of Behavioral Sciences, Feinstein Institutes for Medical Research, Manhasset, NY, USA  
151 <sup>87</sup> Center for Neurobehavioral Genetics, Semel Institute for Neuroscience and Behavior David Geffen School  
152 of Medicine, University of California Los Angeles  
153 <sup>88</sup> Research Group in Psychiatry GIPSI, Department of Psychiatry, Faculty of Medicine, Universidad de  
154 Antioquia, Medellin, Columbia.  
155 <sup>89</sup> The University of Sydney, Sydney, Australia  
156 <sup>90</sup> Research Center for Child Mental Development, Chiba University  
157 <sup>91</sup> United Graduate School of Child Development, Osaka University, Kanazawa University, Hamamatsu  
158 University, Chiba University and University of Fukui  
159 <sup>92</sup> Department of Psychology, University of California, Los Angeles, Los Angeles, CA, USA  
160 <sup>93</sup> Brain Research Institute, University of California, Los Angeles, Los Angeles, CA, USA  
161 <sup>94</sup> Department of Cognitive Behavioral Physiology, Graduate School of Medicine, Chiba University  
162 <sup>95</sup> UThHealth Houston School of Behavioral Health Sciences.  
163 <sup>96</sup> Ghent University, Ghent, Belgium  
164  
165

166 **Corresponding author:**

167 Name: Laura S. van Velzen  
168 Affiliation: Orygen  
169 Centre for Youth Mental Health, University of Melbourne  
170 Address: 35 Poplar Road, Parkville, VIC 3052, Australia  
171 Telephone: +31 6 205 28 057  
172 Email: [laurasvanvelzen@gmail.com](mailto:laurasvanvelzen@gmail.com)  
173  
174  
175  
176  
177

178 **Abstract**

179

180 Previous studies have suggested that alterations in white matter (WM) microstructure are implicated  
181 in suicidal thoughts and behaviours (STBs). However, findings of diffusion tensor imaging (DTI)  
182 studies have been inconsistent. In this large-scale mega-analysis conducted by the ENIGMA  
183 Suicidal Thoughts and Behaviours (ENIGMA-STB) consortium, we examined WM alterations  
184 associated with STBs.

185 Data processing was standardised across sites, and resulting WM microstructure measures  
186 (fractional anisotropy, axial diffusivity, mean diffusivity and radial diffusivity) for 25 WM tracts were  
187 pooled across 40 cohorts. We compared these measures among individuals with a psychiatric  
188 diagnosis and lifetime history of suicide attempt ( $n=652$ ; mean age= $35.4\pm 14.7$ ; female= $71.8\%$ ),  
189 individuals with a psychiatric diagnosis but no STB (i.e., clinical controls;  $n=1871$ ; mean  
190 age= $34\pm 14.8$ ; female= $59.8\%$ ), and individuals with no mental disorder diagnosis and no STB (i.e.,  
191 healthy controls;  $n=642$ ; mean age= $29.6\pm 13.1$ ; female= $62.9\%$ ). We also compared these measures  
192 among individuals with recent suicidal ideation ( $n=714$ ; mean age= $36.3\pm 15.3$ ; female= $66.1\%$ ),  
193 clinical controls ( $n=1184$ ; mean age= $36.8\pm 15.6$ ; female= $63.1\%$ ), and healthy controls ( $n=1240$ ;  
194 mean age=  $31.6\pm 15.5$ ; female= $61.0\%$ ).

195 We found subtle but statistically significant effects, such as lower fractional anisotropy associated  
196 with a history of suicide attempt, over and above the effect of psychiatric diagnoses. These effects  
197 were strongest in the corona radiata, thalamic radiation, fornix/stria terminalis, corpus callosum and  
198 superior longitudinal fasciculus. Effect sizes were small (Cohen's  $d < 0.25$ ). Recent suicidal ideation  
199 was not associated with alterations in WM microstructure.

200 This large-scale coordinated mega-analysis revealed subtle regional and global alterations in WM  
201 microstructure in individuals with a history of suicide attempt. Longitudinal studies are needed to  
202 confirm whether these alterations are a risk factor for suicidal behaviour.

## 203 Introduction

204 Suicide is a worldwide public health concern, with more than 700,000 deaths by suicide occurring  
205 worldwide annually [1]. For each death by suicide, it is estimated that there are more than 20  
206 attempts, which has a cascading effect that negatively impacts families, friends, and communities  
207 [1]. Despite widespread international efforts to reduce deaths by suicide, the number of deaths by  
208 suicide continues to increase in several regions of the world [2]. Risk and protective factors for  
209 suicidal thoughts and behaviours (STBs) have been identified [3]. Our current understanding of the  
210 underlying pathophysiological mechanisms is limited. Therefore, it is crucial that we increase our  
211 knowledge and understanding of these neurobiological mechanisms so that we can better target  
212 prevention and intervention efforts for individuals with high suicide risk.

213  
214 Many prior magnetic resonance imaging (MRI) studies have sought to identify neural correlates of  
215 suicidal ideation and suicide attempt [for a review, please see 4, 5]. However, identifying robust and  
216 reliable patterns of neural alterations associated with STBs has been hampered by methodological  
217 heterogeneity across studies. Furthermore, due to the high clinical heterogeneity, associations with  
218 brain alterations are likely subtle; hence, large samples are needed to increase statistical power and  
219 identify neural correlates of STBs. The ENIGMA Suicidal Thoughts and Behaviours (ENIGMA-STB)  
220 consortium was established to address these issues by pooling data across international research  
221 groups to identify neural correlates of STBs. In our first study of subcortical and cortical grey matter  
222 morphology and STBs in young people between 8 and 25 years of age, we identified a subtle  
223 association between lifetime history of suicide attempt and the surface area of the frontal pole, a  
224 region in the prefrontal cortex [6], in a well-phenotyped subsample that was enriched for STBs and  
225 more severe symptoms of major depressive disorder (MDD) or bipolar disorder (BD). In addition to  
226 grey matter morphology, alterations in the microstructure of white matter (WM) tracts connecting  
227 brain regions may also contribute to risk for STBs. Identifying these WM alterations could reveal new  
228 treatment targets and increase the accuracy of monitoring or treatment response prediction.

229  
230 Previous neuroimaging studies have used diffusion tensor imaging (DTI) to examine microstructural  
231 alterations related to STBs [for a review, please see 7]. These studies have focused primarily on



232 fractional anisotropy (FA), which measures the coordinated directionality of water diffusion in WM  
233 fibre tracts and may reflect the coherence and myelination of neuronal fibres [8, 9]. A lifetime history  
234 of suicide attempt has been associated with lower FA values in various regions and WM tracts,  
235 including in the prefrontal cortex (PFC) [10–13], corpus callosum [14–16], cingulum [11], internal  
236 capsule [11, 17], uncinate fasciculus [16, 18], and inferior fronto-occipital fasciculus [16]. However,  
237 other studies found higher FA in individuals with a history of suicide attempt [19, 20]. Fewer studies  
238 have examined associations between FA measures and suicidal ideation, but findings from these  
239 studies suggest that suicidal ideation is associated with lower FA in the corpus callosum [21, 22],  
240 uncinate fasciculus [23], and corona radiata [21].

241

242 Thus, few studies have examined WM microstructural alterations related to suicidal ideation, and  
243 findings on suicide attempt are inconsistent across studies. Prior studies are hampered by small  
244 sample sizes [4], which decreases the likelihood of identifying true effects, increases the probability  
245 of false-negative findings, and may cause inflation of effect sizes [24]. In addition, large samples may  
246 be needed to identify subtle associations between STBs and WM microstructure. Finally, most prior  
247 studies focused on FA and did not examine other WM diffusivity measures, including axial diffusivity  
248 (AD), which is associated with axonal number and organisation; mean diffusivity (MD), which may  
249 be an estimate of membrane density; and radial diffusivity (RD), which can provide insights into  
250 myelination [25, 26]. Previous studies have also focused only on the presence or absence of suicidal  
251 ideation or suicide attempt, and have not examined specific aspects of suicide-related thoughts, such  
252 as the severity of suicidal ideation.

253

254 To address these limitations, we pooled data from 40 cohorts from the ENIGMA-STB consortium to  
255 examine associations between measures of WM microstructure (FA, AD, MD and RD) for 25 WM  
256 tracts and STBs in a large transdiagnostic sample. We examined WM microstructure alterations in  
257 people with a psychiatric diagnosis and lifetime history of suicide attempt compared to individuals  
258 with a diagnosis but no history of suicide attempt (i.e., clinical controls; CLC) and individuals with no  
259 disorder and no history of suicide attempt (healthy controls). In addition, we examined WM alterations

260 in people with recent suicidal ideation (within the last six months) but no history of suicide attempt,  
261 compared to CLC and HC.

262

263 Based on previous findings concerning suicidal behaviour, we expected that a lifetime history of  
264 suicide attempt would be associated with lower FA in WM tracts that connect the frontal lobe with  
265 limbic regions or connect different limbic regions, such as the cingulum, corpus callosum, internal  
266 capsule, and uncinate fasciculus [11, 14, 17, 18, 23].

267

268 In a subsample of participants for whom more in-depth assessment of STBs from the Columbia  
269 Suicide Severity Rating Scale (CSSRS) was available, we investigated associations between WM  
270 microstructure and the severity of suicidal ideation. Finally, in this sample, we were able to examine  
271 associations between WM microstructure and suicide attempt, and also distinguish among  
272 interrupted, aborted, and actual suicide attempt.

273

## 274 **Patients and methods**

### 275 Cohorts

276 We pooled data from 40 international cohorts from 15 countries (see Supplementary Figure 1) to  
277 investigate the association between STBs and WM microstructure in a transdiagnostic sample,  
278 including individuals diagnosed with major depressive disorder, obsessive-compulsive disorder,  
279 bipolar disorder, post-traumatic stress disorder, psychotic disorders, generalised anxiety disorder,  
280 panic disorder, or social anxiety disorder. Demographic characteristics of the different samples are  
281 presented in **Table 1** and **Table 2**. The inclusion and exclusion criteria for the different studies are  
282 shown in **Supplemental Table S1**. All cohorts obtained ethics approval from their local institutional  
283 review boards and ethics committees. Participants who were 18 years old and over provided written  
284 informed consent; those under the age of 18 years provided written informed assent in addition to  
285 written informed consent from a parent/guardian at the local institution.

286

287

288  
289  
290  
291  
292

**Table 1. Descriptive statistics for sites included in the lifetime suicide attempt analyses**

Presented here are age (mean and standard deviation) and sex for the three groups (HC: healthy controls, CLC: clinical controls, group with lifetime suicide attempt) for the different sites included in the analysis on lifetime history of suicide attempt.

| Site                                                                | Age HC         | Age CLC        | Age suicide attempt group | % female HC | % female CLC | % female suicide attempt group | Total N HC | Total N CLC | Total N suicide attempt group |
|---------------------------------------------------------------------|----------------|----------------|---------------------------|-------------|--------------|--------------------------------|------------|-------------|-------------------------------|
| BiDirect                                                            | -              | 48.6<br>(7.3)  | 49.5<br>(7.3)             | -           | 56.3         | 66.9                           | 0          | 316         | 124                           |
| CHU Montpellier BICS                                                | 42.2<br>(11.7) | 45.3<br>(14.4) | 44.2<br>(13.8)            | 71.4        | 86.4         | 90.0                           | 21         | 22          | 20                            |
| CHU Montpellier IMPACT                                              | -              | 38.3<br>(12.9) | 38.6<br>(9.8)             | -           | 94.4         | 85.7                           | 0          | 18          | 7                             |
| CHU Montpellier UF8555                                              | 37.3<br>(7.9)  | 35.4<br>(8.4)  | 37.9<br>(9.5)             | 100.0       | 100.0        | 100.0                          | 28         | 47          | 42                            |
| DCHS                                                                | 30.9<br>(5.6)  | 29.7<br>(6.4)  | 32.3<br>(6.0)             | 100.0       | 100.0        | 100.0                          | 22         | 20          | 9                             |
| MOODS team DEP-ARREST CLIN                                          | 35.5<br>(13.0) | 33.2<br>(10.2) | 34.8<br>(14.3)            | 67.7        | 70.8         | 63.0                           | 31         | 24          | 27                            |
| ETPB-STB                                                            | 33.9<br>(11.3) | 34.3<br>(7.9)  | 34.8<br>(11.9)            | 65.0        | 50.0         | 63.6                           | 20         | 12          | 11                            |
| Fondazione Santa Lucia _ Neuropsychiatry Lab / (FSL_NPL)-OCD sample | 39.3<br>(10.5) | 39.9<br>(11.1) | 38.1<br>(7.6)             | 35.4        | 34.9         | 36.4                           | 82         | 43          | 11                            |
| FSL_NPL - Schizophrenia sample                                      | -              | 40.7<br>(11.7) | 43.9<br>(9.9)             | -           | 32.7         | 44.4                           | 0          | 49          | 18                            |
| Ghent                                                               | 33.6<br>(13.4) | 38.2<br>(11.7) | 34.8<br>(11.9)            | 94.1        | 53.3         | 69.2                           | 17         | 15          | 13                            |
| GIPSI BD                                                            | -              | 31.5<br>(10.3) | 34.4<br>(11.3)            | -           | 25.0         | 25.0                           | 0          | 24          | 8                             |
| GIPSI SZ                                                            | -              | 39.7<br>(11.9) | 40.0<br>(11.4)            | -           | 62.2         | 68.0                           | 0          | 45          | 25                            |
| Grady Trauma Project Emory University                               | 39.4<br>(13.0) | 39.3<br>(12.1) | 36.1<br>(10.9)            | 97.8        | 100.0        | 100.0                          | 46         | 51          | 14                            |
| Halifax                                                             | 40.4<br>(13.7) | 42.8<br>(17.8) | 51.0<br>(16.5)            | 64.3        | 41.2         | 57.1                           | 42         | 17          | 7                             |



|                                                    |                        |                        |                        |             |             |             |            |             |            |
|----------------------------------------------------|------------------------|------------------------|------------------------|-------------|-------------|-------------|------------|-------------|------------|
| Houston BD                                         | 24.1<br>(14.7)         | 29.1<br>(16.4)         | 30.2<br>(11.2)         | 43.1        | 48.4        | 64.3        | 51         | 64          | 14         |
| LTS Colorado site 1                                | 28.7<br>(1.1)          | 28.6<br>(0.9)          | 28.5<br>(0.5)          | 63.6        | 37.0        | 76.9        | 55         | 92          | 13         |
| LTS Colorado site 2                                | 28.6<br>(0.6)          | 28.7<br>(0.8)          | 28.6<br>(0.5)          | 73.3        | 62.5        | 66.7        | 30         | 72          | 9          |
| McGill University                                  | 35.8<br>(8.0)          | 44.5<br>(11.3)         | 39.4<br>(10.6)         | 53.3        | 50.0        | 77.8        | 15         | 14          | 9          |
| MR-IMPACT                                          | -                      | 15.0<br>(1.4)          | 15.2<br>(1.2)          | -           | 67.1        | 91.4        | 0          | 70          | 35         |
| PAFIP                                              | -                      | 29.8<br>(8.5)          | 27.3<br>(7.8)          | -           | 36.4        | 26.7        | 0          | 77          | 15         |
| San Raffaele Hospital                              | -                      | 47.7<br>(10.9)         | 46.7<br>(10.2)         | -           | 63.5        | 74.7        | 0          | 288         | 79         |
| Sydney Bipolar Kids and Siblings                   | 20.9<br>(3.6)          | 23.0<br>(4.8)          | 24.1<br>(4.0)          | 52.2        | 65.5        | 75.0        | 67         | 84          | 24         |
| Sydney Brain and Mind Centre                       | -                      | 19.5<br>(3.5)          | 18.1<br>(2.6)          | -           | 65.1        | 68.8        | 0          | 169         | 32         |
| UCSF Adolescent MDD                                | 15.4<br>(1.4)          | 15.7<br>(1.3)          | 16.0<br>(1.1)          | 60.0        | 55.8        | 71.4        | 40         | 43          | 14         |
| University of Minnesota Adolescent MDD             | 16.5<br>(2.2)          | 15.5<br>(1.8)          | 16.9<br>(2.1)          | 72.7        | 78.9        | 71.4        | 11         | 38          | 7          |
| University of Texas- Austin - Bipolar Seed Program | 20.5<br>(1.7)          | 21.0<br>(2.3)          | 22.4<br>(2.0)          | 68.4        | 73.3        | 57.1        | 19         | 15          | 7          |
| University of Washington/ Harvard                  | 12.0<br>(1.8)          | 12.4<br>(2.6)          | 14.4<br>(1.8)          | 46.7        | 35.5        | 60.0        | 45         | 31          | 5          |
| Yale School of Medicine                            | -                      | 19.3<br>(3.4)          | 19.0<br>(3.2)          | -           | 60.4        | 73.6        | 0          | 111         | 53         |
| <b>Total</b>                                       | <b>29.6<br/>(13.1)</b> | <b>34.0<br/>(14.8)</b> | <b>35.4<br/>(14.7)</b> | <b>62.9</b> | <b>59.8</b> | <b>71.8</b> | <b>642</b> | <b>1871</b> | <b>652</b> |

293  
294

295 **Table 2. Descriptive statistics for studies included in the recent suicidal ideation analysis**  
 296 Presented here are age (mean and standard deviation) and sex for the three groups (HC: healthy  
 297 controls, CLC: clinical controls, group with recent suicidal ideation) for the different sites included in  
 298 the analysis on suicidal ideation.  
 299

| Site | Age HC | Age CLC | Age suicidal | % female | % female | % female | Total N HC | Total N CLC | Total N suicidal |
|------|--------|---------|--------------|----------|----------|----------|------------|-------------|------------------|
|------|--------|---------|--------------|----------|----------|----------|------------|-------------|------------------|

|                                               |                | ideation<br>group | HC             | CLC   | suicidal<br>ideation<br>group |       |     | ideation<br>group |    |
|-----------------------------------------------|----------------|-------------------|----------------|-------|-------------------------------|-------|-----|-------------------|----|
| BiDirect                                      | -              | 48.7<br>(7.3)     | 48.3<br>(7.0)  | -     | 57.0                          | 65.2  | 0   | 405               | 46 |
| Brazilian High<br>Risk Cohort<br>Porto Alegre | 11.0<br>(2.0)  | 11.2<br>(1.9)     | 11.2<br>(1.9)  | 48.1  | 61.9                          | 80.0  | 181 | 21                | 5  |
| Chiba<br>University                           | 31.2<br>(8.4)  | 34.1<br>(6.3)     | 32.2<br>(7.8)  | 20.0  | 65.0                          | 61.5  | 5   | 20                | 26 |
| CHU<br>Montpellier<br>BICS                    | 42.2<br>(11.7) | 54.5<br>(10.7)    | 41.9<br>(14.3) | 71.4  | 83.3                          | 87.5  | 21  | 6                 | 16 |
| CHU<br>Montpellier<br>IMPACT                  | -              | 35.3<br>(12.7)    | 43.0<br>(12.6) | -     | 90.9                          | 100.0 | 0   | 11                | 7  |
| CHU<br>Montpellier<br>UF8555                  | 38.6<br>(8.2)  | 36.3<br>(7.7)     | 33.9<br>(9.9)  | 100.0 | 100.0                         | 100.0 | 10  | 32                | 14 |
| MOODS team<br>DEP-<br>ARREST-<br>CLIN         | 35.5<br>(13.0) | -                 | 31.9<br>(10.4) | 67.7  | -                             | 66.7  | 31  | 0                 | 18 |
| EPISCA<br>(Leiden<br>adolescents)             | 14.6<br>(1.6)  | 15.9<br>(2.2)     | 15.8<br>(1.7)  | 85.0  | 80.0                          | 86.4  | 20  | 10                | 22 |
| ETPB-STB                                      | 34.6<br>(11.8) | -                 | 34.1<br>(9.0)  | 72.2  | -                             | 62.5  | 18  | 0                 | 8  |
| FSL_NPL-<br>OCD sample                        | -              | 35.1<br>(12.3)    | 38.7<br>(7.9)  | -     | 39.6                          | 0.0   | 0   | 53                | 6  |
| FOR2107<br>Marburg                            | 38.1<br>(13.4) | 35.9<br>(12.8)    | 35.0<br>(12.8) | 65.4  | 81.5                          | 57.9  | 243 | 27                | 38 |
| FOR2107<br>Muenster                           | 29.5<br>(11.2) | 27.6<br>(9.8)     | 36.6<br>(12.7) | 64.9  | 71.0                          | 63.6  | 154 | 31                | 44 |
| Grady Trauma<br>Project Emory<br>University   | 38.4<br>(12.4) | 41.3<br>(11.4)    | 34.7<br>(12.7) | 97.7  | 97.5                          | 100.0 | 44  | 40                | 11 |
| Jena-SB                                       | -              | 39.8<br>(11.1)    | 37.6<br>(13.1) | -     | 53.5                          | 81.8  | 0   | 15                | 22 |
| KASP                                          | -              | 26.3<br>(6.1)     | 26.1<br>(7.0)  | -     | 52.2                          | 12.5  | 0   | 23                | 8  |
| McGill<br>University                          | 35.8<br>(7.9)  | 47.7<br>(9.6)     | 42.1<br>(12.6) | 53.3  | 50.0                          | 50.0  | 15  | 6                 | 8  |
| MR-IMPACT                                     | -              | 15.1<br>(1.4)     | 14.8<br>(1.4)  | -     | 72.5                          | 62.1  | 0   | 40                | 29 |
| Muenster                                      | 42.1           | 38.1              | 36.1           | 54.2  | 56.8                          | 58.2  | 260 | 37                | 98 |

|                                                   |                        |                        |                        |             |             |             |             |             |            |
|---------------------------------------------------|------------------------|------------------------|------------------------|-------------|-------------|-------------|-------------|-------------|------------|
| Neuroimaging Cohort                               | (10.9)                 | (12.0)                 | (12.4)                 |             |             |             |             |             |            |
| San Raffaele Hospital                             | -                      | 48.0<br>(10.0)         | 48.3<br>(10.7)         | -           | 63.5        | 62.9        | 0           | 74          | 151        |
| Stanford University FAA                           | 30.6<br>(10.2)         | 35.7<br>(6.7)          | 35.5<br>(9.9)          | 100.0       | 100.0       | 100.0       | 18          | 6           | 8          |
| STRADL site 1                                     | -                      | 52.5<br>(11.7)         | 54.4<br>(13.8)         | -           | 65.0        | 71.4        | 0           | 20          | 14         |
| STRADL site 2                                     | -                      | 56.3<br>(10.2)         | 54.9<br>(6.4)          | -           | 85.0        | 75.0        | 0           | 20          | 12         |
| Sydney Brain and Mind Centre                      | 24.0<br>(4.3)          | 20.0<br>(4.3)          | 19.7<br>(4.9)          | 56.0        | 59.8        | 69.8        | 75          | 112         | 43         |
| TIPS-Jena                                         | 47.4<br>(16.1)         | 46.8<br>(12.3)         | 42.7<br>(13.0)         | 51.5        | 56.0        | 50.0        | 66          | 25          | 16         |
| UCSF Adolescent MDD                               | 15.4<br>(1.4)          | 15.7<br>(1.3)          | 15.7<br>(1.4)          | 60.0        | 61.1        | 28.6        | 40          | 36          | 7          |
| University of Minnesota Adolescent MDD            | 16.1<br>(1.9)          | 15.9<br>(1.9)          | 15.6<br>(2.0)          | 55.0        | 75.9        | 83.3        | 20          | 29          | 24         |
| University of Texas- Austin -Bipolar Seed Program | 20.5<br>(1.7)          | 21.1<br>(2.2)          | 20.8<br>(2.7)          | 68.4        | 70.0        | 80.0        | 19          | 10          | 5          |
| Yale School of Medicine                           | -                      | 19.2<br>(3.5)          | 18.1<br>(2.5)          | -           | 57.3        | 75.0        | 0           | 75          | 8          |
| <b>Total</b>                                      | <b>31.6<br/>(15.5)</b> | <b>36.8<br/>(15.6)</b> | <b>36.3<br/>(15.3)</b> | <b>61.0</b> | <b>63.1</b> | <b>66.1</b> | <b>1240</b> | <b>1184</b> | <b>714</b> |

300  
301  
302

### 303 Image processing

304 Scanner characteristics and acquisition parameters for all cohorts are provided in Supplemental  
305 **Table S2**. Each site performed local preprocessing of diffusion-weighted images, including diffusion  
306 tensor fitting. The pre-processed images were then processed using the ENIGMA-DTI protocol,  
307 including quality control procedures. This protocol is freely available on the ENIGMA-GitHub  
308 webpage (<https://github.com/ENIGMA-git#enigma-dti-imaging>) and NITRC  
309 ([http://www.nitrc.org/projects/enigma\\_dti](http://www.nitrc.org/projects/enigma_dti)). For 24 tracts of interest, FA, AD, MD and RD measures  
310 were extracted (please see Supplemental **Table S3**). We combined regions of interest (ROIs) across

311 hemispheres by calculating the mean of the left and right hemispheres, weighted by the number of  
312 voxels, in order to reduce the number of statistical tests. In addition, a global anisotropy or diffusivity  
313 measure was created, leading to a total of 25 measures for FA, AD, MD, and RD.

314

315 The WM microstructure measures were harmonised across sites using the ComBat algorithm in R  
316 [27, 28]. An empirical Bayes approach was used to adjust for variability between scanners while  
317 preserving biological variability related to age, sex, and diagnosis. In line with our previous study [6],  
318 all DTI measures included in the analyses were ComBat-corrected. Finally, within-site outliers  
319 (measures greater than three standard deviations away from the mean of that region) were visually  
320 inspected and, if necessary, excluded from the analysis.

321

### 322 Statistical analysis

323 The main aim of this study was to examine associations among WM microstructure, lifetime history  
324 of suicide attempt, and recent (in the last six months) suicidal ideation in a large transdiagnostic  
325 sample. The cohorts included in this multi-study analysis administered different instruments to  
326 assess recent suicidal ideation and lifetime history of attempt. We used a similar approach to our  
327 previous study [6] to harmonise these measures across studies (see Supplemental **Table S4**).  
328 Lifetime history of suicide attempt (coded yes/no) was determined using clinical interviews (e.g., the  
329 Kiddie Schedule for Affective Disorders and Schizophrenia (K-SADS; [29]) or Structured Clinical  
330 Interview for DSM-5 (SCID; [30])) or detailed clinical scales on STBs (e.g., the CSSRS [31] or Self-  
331 Injurious Thoughts and Behaviours Interview (SITBI; [32])). Recent suicidal ideation (yes/no in the  
332 past six months or more recent) was assessed using items from depression severity rating scales  
333 (e.g. the Hamilton Depression Rating Scale (HDRS; [33]), Beck Depression Inventory (BDI; [34, 35]),  
334 detailed clinical scales on STBs (e.g., CSSRS or Beck Scale for Suicidal Ideation (SSI; [36, 37]) and  
335 clinical interviews (e.g. SCID). Similar to our previous study [6], we conducted separate analyses for  
336 suicidal ideation and suicide attempt to optimise the sample size for each analysis, as only 16 out of  
337 the 40 cohorts had information on both suicidal ideation and suicide attempt. In total, we included  
338 data from 28 cohorts in the analysis on lifetime suicide attempt and from 28 cohorts in the analysis  
339 on recent suicidal ideation.

340

341 We assessed differences among groups in global and regional anisotropy or diffusivity measures  
342 using multiple linear regression models in R [38]. We included a group variable to compare  
343 individuals with a lifetime history of suicide attempt ( $N=652$ ) to either CLC ( $N=1871$ ) or HC ( $N=642$ )  
344 (two group comparisons). A group variable was also included to compare individuals with recent  
345 suicidal ideation ( $N=714$ ) to CLC ( $N=1184$ ) and HC ( $N=1240$ ) in separate analyses. In supplementary  
346 analyses, we also compared the HC and CLC groups (please see Supplemental **note 1** for a  
347 description of the methods and results). Consistent with previous ENIGMA-DTI analyses [39], the  
348 analyses were corrected for age, sex, and their linear and non-linear interactions (age-by-sex  
349 interaction,  $\text{age}^2$  and  $\text{age}^2$ -by-sex interaction). Effect sizes were assessed using the Cohen's  $d$   
350 metric. All  $p$ -values were corrected for multiple testing (for the 25 tracts per anisotropic/diffusivity  
351 measure) using the Benjamini-Hochberg correction in R, resulting in  $\text{FDR} < .05$ .

352

353 Finally, in supplementary analyses, we examined interactions between group and type of lifetime  
354 psychiatric diagnosis in a subsample of participants, as data on lifetime psychiatric diagnosis were  
355 not available for all participants (please see Supplemental **note 2** for a description of the methods  
356 and results).

357

### 358 ***Analysis in the CSSRS sample***

359 We also examined associations between WM microstructure and more detailed phenotypes of  
360 suicide attempt and suicidal ideation in a subsample of 7 cohorts that used the CSSRS to assess  
361 STBs. The CSSRS was specifically developed to assess the intensity and severity of suicidal  
362 thoughts and suicidal behaviour [31]. C-SSRS has good validity, high sensitivity and specificity for  
363 suicide attempts [40].

364

365 For analyses of suicidal ideation, we examined how the nominal measures of recent or lifetime  
366 severity of suicidal ideation (coded 0-5; 0: no ideation; 1: passive ideation; 2: non-specific active  
367 ideation; 3: active ideation with a method, but no plan or intent; 4: active ideation with intent, but no

368 plan; 5: active ideation with a plan and intent) were associated with WM microstructure. For these  
369 analyses, the standardised beta was calculated as an effect size.

370

371 In line with our previous study, for analyses of suicide attempt, we compared anisotropy/diffusivity  
372 measures between individuals with a lifetime history of any attempt (actual, aborted, or interrupted  
373 attempt) and individuals with no lifetime history of any attempt [6]. In addition, we compared these  
374 measures between individuals with a lifetime history of an actual (non-interrupted and non-aborted)  
375 attempt and those without any lifetime suicide attempt. Finally, these measures were compared  
376 between individuals with a history of suicidal ideation (but no history of an actual suicide attempt),  
377 and those with a lifetime history of an actual attempt. Cohen's *d* metric was calculated as an effect  
378 size for these analyses.

379

380 Similar to the main analyses, all analyses in the CSSRS sample included age, sex, age-by-sex, age<sup>2</sup>,  
381 and age<sup>2</sup>-by-sex as covariates, and all resulting p-values were corrected for multiple testing (for the  
382 25 tracts per anisotropic/diffusivity measure) using the Benjamini-Hochberg correction in R to lead  
383 to FDR<.05.

384

## 385 **Results**

### 386 **Lifetime suicide attempt**

#### 387 Individuals with a lifetime history of suicide attempt versus HC

388 Global FA and regional FA were lower in the attempt group (*N*=652) compared to HC (*N*=642) in the  
389 following tracts: anterior limb of the internal capsule (ALIC), body of the corpus callosum (BCC),  
390 corpus callosum (CC), cingulate gyrus of the cingulum bundle (CGC), corona radiata (CR), external  
391 capsule (EC), fornix/*stria terminalis* (FXST), genu of the corpus callosum (GCC), inferior fronto-  
392 occipital fasciculus (IFO), posterior *corona radiata* (PCR), posterior thalamic radiation (PTR),  
393 retrolenticular part of the internal capsule (RLIC), splenium of the corpus callosum (SCC), superior  
394 *corona radiata* (SCR), superior longitudinal fasciculus (SLF), sagittal stratum (SS), and uncinate  
395 fasciculus (UNC) (Cohen's *d* range: 0.125-0.226; **Figure 1.A** and Supplemental **table S6**). In  
396 addition, MD was higher in the UNC in the attempt group compared to HC (Cohen's *d*=0.220;



397 Supplemental **table S7**). Finally, RD was higher in the BCC, CC, CR, FXST, PCR, SCC, SLF, and  
398 UNC in the attempt group compared to HC (Cohen's *d* range: 0.148-0.170; **Figure 1.A** and  
399 Supplemental **table S8**). There were no significant differences in AD between the attempt group and  
400 HC (Supplemental **table S5**).

401

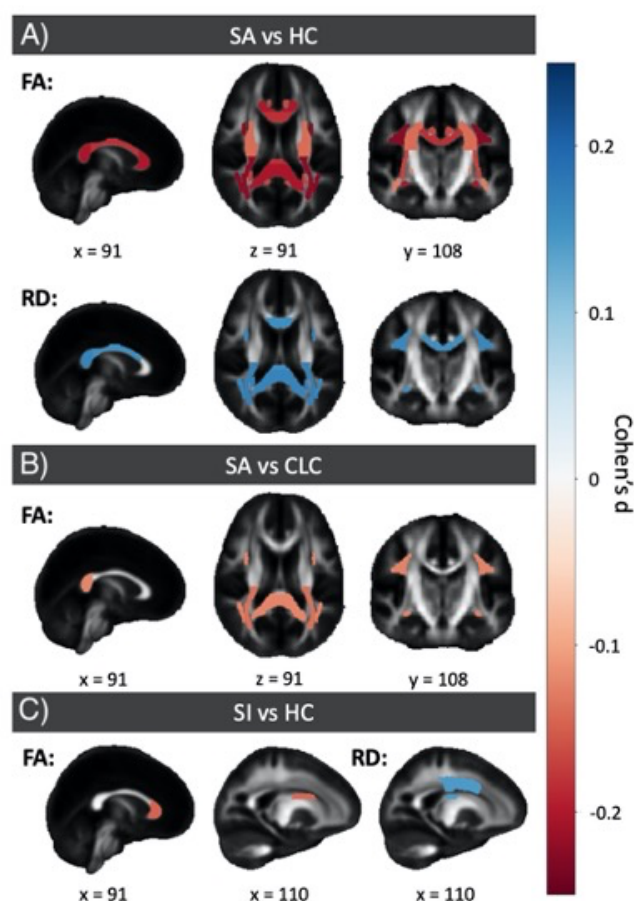

402

403

404 **Figure 1.**  
405 Cohen's *d* map represents significant ROIs without the global covariate and threshold of pFDR < 0.05. From left to right,  
406 middle slices of sagittal, axial, and coronal views were used, except for C, where only the sagittal view was used.  
407 The figure includes three sections: A) FA and RD for individuals with a lifetime history of suicide attempt versus HC, B)  
408 FA for individuals with a lifetime history of suicide attempt versus CLC and C) FA and RD for individuals with recent  
409 suicidal ideation versus HC.

410 **Abbreviations:** CLC= clinical control group ; FA= fractional anisotropy; HC= healthy control group; pFDR= p value  
411 corrected using Benjamini Hochberg correction; RD= radial diffusivity; ROI= region of interest; SA= individuals with a  
412 lifetime history of suicide attempt; SI= individuals with recent suicidal ideation.

#### 413 Individuals with a lifetime history of suicide attempt versus CLC

414 Global and regional AD, MD, and RD did not differ between individuals with a lifetime history of  
415 suicide attempt (*N*=652) and CLC (*N*=1871) (**Figure 1.B**, Supplemental **tables S9**, **S11**, and **S12**).

416 Regional FA was lower in the CR, FXST, PCR, PTR, SCC and SLF in the suicide attempt group  
417 compared to CLC (Cohen's *d* range: 0.123-0.138; Supplemental **table S10**).

418

### 419 **Recent suicidal ideation**

#### 420 Individuals with recent suicidal ideation versus HC

421 Global and regional AD and MD did not differ between the suicidal ideation group (*N*=714) and HC  
422 (*N*=1240) (Supplemental **tables S13 and S15**). Global FA and regional FA in the CR, GCC and  
423 superior fronto-occipital fasciculus (SFO) were lower in the suicidal ideation group compared to HC  
424 (Cohen's *d* range: 0.133-0.158; **Figure 1.C**, Supplemental **table S14**). Global RD and regional RD  
425 in the SCR were higher in the suicidal ideation group compared to HC (Cohen's *d*: 0.142-0.150;  
426 Supplemental **table S16**).

427

#### 428 Individuals with recent suicidal ideation versus CLC

429 There were no significant differences between the suicidal ideation group (*N*=714) and CLC  
430 (*N*=1184) (Supplemental **tables S17-20**).

431

### 432 **Deeper phenotyping in the C-SSRS sample**

433 There were no significant associations of regional FA, AD, MD, RD, with severity of lifetime suicidal  
434 ideation (*N*=299; Supplemental **tables S21-24**) or severity of recent suicidal ideation (*N*=338;  
435 Supplemental **tables S25-28**). In addition, there were no significant differences in WM microstructure  
436 between people with a lifetime history of an actual suicide attempt (*N*=134) and those without a  
437 history of any suicide attempt (no interrupted, aborted, or actual suicide attempt; *N*=244)  
438 (Supplemental **tables 29-32**). Moreover, there were no significant differences between people with  
439 an actual suicide attempt (*N*=134) and those with lifetime suicidal ideation, but without a history of  
440 an actual suicide attempt (*N*=122; Supplemental **tables 33-36**). Finally, there were no differences in  
441 FA or diffusivity measures between people with a lifetime history of an interrupted, aborted, or actual  
442 suicide attempt (*N*=177) compared to individuals without a lifetime history of any subtype of suicide  
443 attempt (*N*=244; Supplemental **tables S37-40**).

444

## 445 Discussion

446 In this large-scale multi-cohort transdiagnostic analysis, we examined associations between global  
447 and regional measures of WM microstructure and STBs in a pooled sample from 40 international  
448 cohorts. A lifetime history of suicide attempt was associated with subtle differences in global and  
449 regional FA and diffusivity (higher regional MD and RD), and recent suicidal ideation was associated  
450 with lower global and regional FA and higher global and regional RD.

451

452 Individuals with a lifetime history of suicide attempts had lower regional FA than did clinical controls.  
453 This analysis was undertaken to ascertain that the observed differences are not merely attributable  
454 to microstructural variances associated with psychiatric disorders, but rather, are significantly  
455 influenced by lifetime suicide attempt. The WM tracts that showed this difference between individuals  
456 with a lifetime history of suicide attempt and CLC included the *corona radiata* (including the posterior  
457 *corona radiata*), part of the fornix (*fornix/stria terminalis*), thalamic radiation (specifically the posterior  
458 thalamic radiation), splenium of the corpus callosum, and the superior longitudinal fasciculus. The  
459 *corona radiata* and the thalamic radiation connect the cortex with subcortical brain structures,  
460 including the brainstem and thalamus. The *corona radiata* is part of the thalamic-cortical circuitry and  
461 has been associated with perceptual, motor, emotional and cognitive function, including behavioural  
462 regulation, and lower FA in the *corona radiata* has been associated with poorer executive functioning  
463 [41–44]. In addition, previous single-cohort studies have reported that lower FA in the corona radiata  
464 is associated with suicidal behaviour [16, 45], albeit inconsistently [20]. Moreover, lower FA in the  
465 *corona radiata* predicted suicidal behaviour on average two years later [46]. The (posterior) thalamic  
466 radiations also connect the thalamus with cortical regions, including the parietal and occipital lobes.  
467 These are important for cortical arousal and consciousness but may also be associated with  
468 cognitive control [47]. While lower FA in this tract has not been associated with suicidal behaviour  
469 before, FA in this tract was lower in individuals with BD [48], who are at higher risk of suicidal  
470 behaviour [49]. The splenium of the corpus callosum connects the occipital-parietal and temporal  
471 cortex from both hemispheres and has been associated with visuospatial functioning, reading,  
472 language processing, and consciousness [50]. Lower FA in the splenium of the corpus callosum has  
473 been associated with a higher number of suicide attempts in BD and MDD [14]. The fornix (including

474 the fornix/*stria terminalis*) connects the amygdala to the hypothalamus and plays an important role  
475 in threat monitoring, regulation of the hypothalamic-pituitary-adrenal (HPA) axis and behavioural  
476 inhibition [51]. In addition, previous investigators have speculated that impaired structural  
477 connectivity in this tract may contribute to feelings of anhedonia [52], which may drive suicidality [53].  
478 Finally, the superior longitudinal fasciculus is an association tract that connects the parietal and  
479 temporal cortex with the frontal cortex and may play a role in speech, spatial awareness, processing  
480 speed, and attention [54]. FA in this region has inconsistently been associated with suicidality (see  
481 [20, 55] and has been consistently linked to brooding and rumination [56], which are risk factors for  
482 suicidal behaviour [57].

483

484 In this large sample, we were unable to replicate previous findings of lower FA in other WM tracts,  
485 including the cingulum [11], internal capsule [11, 17], uncinate fasciculus [16, 18], and inferior fronto-  
486 occipital fasciculus [16]. This lack of replication may be related to the small sample size of these  
487 previous studies, related to sample characteristics, or be specific to certain psychiatric disorders.

488

489 We also found differences in global and regional RD between individuals with a history of suicide  
490 attempt and HC but not CLC, suggesting that these findings were driven by psychiatric illness and  
491 not by suicidal behaviour *per se*. Similarly, differences in FA and RD were identified between  
492 individuals with recent suicidal ideation and HC but not CLC, which may also be related to mental  
493 illness in general and not to suicidal ideation specifically. Consistent with this finding, similar effects  
494 for FA were observed comparing CLC to HC; however, these findings were weaker and most did not  
495 survive correction for multiple testing (see Supplemental **note 1**). We hypothesise that mental illness  
496 may be more severe in the suicidal ideation group than in the CLC group, which may explain why  
497 differences in FA were more pronounced.

498

499 Our findings provide evidence consistent with previous ENIGMA reports about differences in WM  
500 microstructure in major depressive disorder [39], bipolar disorder [58] and schizophrenia [59] with  
501 DTI data, where associations with global and regional FA were reported. The MDD study included  
502 1305 individuals diagnosed with MDD and 1602 HC; the results showed lower global FA and regional

503 FA in 16 out of 25 WM tracts and higher RD in adult individuals with recurrent MDD; the largest FA  
504 differences were observed in the corpus callosum and *corona radiata* [39]. On the other hand, the  
505 schizophrenia study included 1963 individuals diagnosed with schizophrenia and 2359 HC, and the  
506 results showed lower global FA and regional FA in 20 out of 25 ROIs; the larger differences were  
507 reported in anterior *corona radiata* and corpus callosum [59]. Finally, the study on bipolar disorder  
508 included 1482 individuals diagnosed with BD and 1551 HC and showed lower global FA and regional  
509 FA in 29 out of 43 tracts in patients, most prominently in the corpus callosum and cingulum [58].

510

511 In a subsample of 7 cohorts, which had more deeply phenotyped suicidal thoughts and behaviours  
512 using the CSSRS, we were able to examine the associations with more detailed phenotypes of  
513 suicide attempt and suicidal ideation. In our previous study [6] on grey matter morphology and STB  
514 in young people, lower surface area of the frontal pole was associated with a history of actual (non-  
515 interrupted or non-aborted) suicide attempt in a subsample of studies that had used the CSSRS to  
516 assess suicidal behaviour (4 out of 7 cohort overlap, 53% total sample overlap with the CSSRS  
517 sample in the current study). In this study, we did not find any associations between WM anisotropy  
518 or diffusivity measures and severity of suicidal ideation, nor did we find differences in these measures  
519 related to suicide attempt in general (actual, interrupted or aborted suicide attempt), or actual suicide  
520 attempt specifically (non-interrupted or non-aborted suicide attempts). It is possible that this sample  
521 was not large enough to identify subtle associations between suicide attempt and WM  
522 microstructure.

523

524 This study increases our understanding of the mechanisms underlying suicidal behaviour by  
525 confirming findings from previous smaller studies that lower FA is implicated in suicidal behaviour  
526 and showing which tracts are involved. However, the effect sizes for significant group differences  
527 observed in this study were small (all  $d < 0.25$ ), especially for differences between the suicidal  
528 ideation/suicide attempt groups and the CLC. High clinical heterogeneity may mask larger effects in  
529 individual persons, which we were not able to detect with the group average approach used in the  
530 current study. Nonetheless, the currently observed differences are too subtle to be clinically useful  
531 in terms of prediction of risk for suicidal behaviour at the individual level. In addition, it is unclear

532 whether alterations in WM microstructure represent a risk factor for suicidal behaviour or are a  
533 consequence of a previous suicide attempt. Previous longitudinal studies have shown that lower  
534 regional FA at baseline predicts suicidal behaviour at follow-up in individuals with mood disorders  
535 [11, 46]. Further, FA has been found to be highly heritable [60], suggesting that alterations in WM  
536 microstructure may indeed represent a risk factor for suicidal behaviour. However, cellular brain  
537 damage following hypoxia/anoxia during a suicide attempt may also cause WM damage and affect  
538 WM microstructure [61].

539

540 A strength of this study is the large sample size, which allowed the examination of more detailed  
541 phenotypes in subsamples. A second strength is the use of harmonised protocols for diffusion image  
542 processing and quality control. However, we should also acknowledge several limitations of this  
543 study, including heterogeneity across samples in how STBs were assessed. We have tried to  
544 minimise this effect by using a detailed process to harmonise these measures across studies (in line  
545 with the approach used in our previous study). Finally, we could not control for severity of psychiatric  
546 symptoms, as this was a transdiagnostic analysis and the different cohorts had used different  
547 severity rating scales; therefore, we cannot rule out the possibility that higher symptom severity in  
548 the suicide attempt group affected our findings. The scope of this study was limited to cross-sectional  
549 findings. However, this presents an opportunity for future research to delve into longitudinal  
550 analyses, shedding light on the evolution of the differences reported.

551

552 To conclude, in this large-scale multi-cohort study we found an association between a history of  
553 suicide attempt and regional FA, above and beyond the effect of psychiatric diagnosis. FA in several  
554 tracts that have been associated with (among others) behavioural regulation/inhibition, executive  
555 functioning, and brooding/rumination show a subtle association with suicidal attempt. Future  
556 longitudinal studies are needed to examine if altered FA may represent a risk factor for suicidal  
557 behaviour, for instance by contributing to lower resilience to severely stressful life events.

558

559

560



## 561 Acknowledgments

562 This work was supported by the MQ Brighter Futures Award MQBFC/2 (LS, LC, MD, LvV, ALvH, HB) and the  
563 National Institute of Mental Health of the National Institutes of Health under Award Number R01MH117601  
564 (LS, LvV, NJ). ALvH was funded by a MQ Brighter Futures Award MQBFC/2, a Royal Society Dorothy  
565 Hodgkin Fellowship (DH15017), an MRC MRF emerging leaders award, the Leiden University Social  
566 Resilience and Security fund, and an NWO VIDI award. HPB was supported by the MQ Brighter Futures  
567 Award MQBFC/2, the National Center for Advancing Translational Science (Grant Number: UL1TR000142),  
568 the National Institute of Mental Health (Grant Numbers: RC1MH088366, R01MH69747), Brain and Behavior  
569 Research Foundation, International Bipolar Disorders Foundation, American Foundation for Suicide  
570 Prevention SRG-1-10-119, and the John and Hope Furth Endowment. EDB is supported by the National  
571 Institute of Mental Health Intramural Research Program (ZIA MH002857). NB is supported by the Italian  
572 Ministry of Health, grant Ricerca Corrente RC 23. The University of Minnesota adolescent MDD study is  
573 supported by the National Institute of Mental Health (K23MH090421), the National Alliance for Research on  
574 Schizophrenia and Depression, the University of Minnesota Graduate School, the Minnesota Medical  
575 Foundation, and the Biotechnology Research Center (P41 RR008079 to the Center for Magnetic Resonance  
576 Research), University of Minnesota, and the Deborah E. Powell Center for Women's Health Seed Grant,  
577 University of Minnesota. FB is supported by the Italian Ministry of Health, grant PNRR-MAD-2022-12375859.  
578 BiDirect was funded by grants from the German Federal Ministry of Education and Research (BMBF; Grants  
579 FKZ-01ER0816 and FKZ-01ER1506) to KB. BB and LC are supported by the Interdisciplinary Center of  
580 Clinical Research of the Medical Faculty Jena. M.C.-R. acknowledges funding support from the Consejería  
581 de Salud y Familias (Junta de Andalucía) 2020 grant, which covers his salary (RH-0081-2020). Funding for  
582 the DEPARRESTCLIN cohort was provided by a national grant (ANR SAMENTA 2012) of the Agence  
583 Nationale de la Recherche (ANR). BCD is funded by a NHMRC CJ Martin fellowship (1161356). BCF  
584 acknowledges this work was supported by the Instituto de Salud Carlos III (PI14/00639 and PI14/00918) and  
585 Fundación Instituto de Investigación Marqués de Valdecilla (NCT0235832 and NCT02534363). UD  
586 acknowledges this work was funded by the German Research Foundation (DFG), Udo Dannowski (co-  
587 speaker FOR2107, DA 1151/5-1, DA 1151/5-2, grant DA1151/9-1, DA1151/10-1 and DA1151/11-1) and the  
588 Interdisciplinary Center for Clinical Research (IZKF) of the medical faculty of Münster (grant Dan3/022/22 to  
589 UD). MuensterNeuroimagingCohort: This work was funded by the German Research Foundation (SFB-  
590 TRR58, Project C09 to UD). JWE is supported by the National Institute of Mental Health Intramural Research  
591 Program (ZIA MH002857). NPF acknowledges the LTS Colorado data acquisition was supported by grants  
592 from the National Institutes of Health (NIH) in the United States (AG046938 and MH063207). NPF was  
593 supported by NIH grants AG046938, , MH117131, MH124846, DA042742, DA046413, DA046064, and  
594 DA051018. IHG is supported by the National Institute of Mental Health Grant R37MH101495. TH  
595 acknowledges this study was supported by funding from the Canadian Institutes of Health Research (103703  
596 , 106469 and 142255, 180449, 186254), Nova Scotia Health Research Foundation, Dalhousie Clinical  
597 Research Scholarship to T. Hajek, Brain & Behavior Research Foundation (formerly NARSAD); 2007 Young  
598 Investigator and 2015 Independent Investigator Awards to T. Hajek. This work was also supported by the  
599 AMED Brain/MINDS Beyond Program (JP18dm0307002) and JSPS KAKENHI (JP19K03309 and  
600 JP22H01090). TCH is supported in part by the National Institutes of Health (K01MH117442, R21MH130817,  
601 R01MH127176). YI was supported by JSPS KAKENHI (JP23K07004). FI was supported by an NHMRC EL1  
602 Investigator Grant (GNT2018157) and the Bill and Patricia Richie Foundation Fellowship. YI was supported  
603 by JSPS KAKENHI (JP23K02956). FJ acknowledges this study was supported by an operating grant from  
604 the Canadian Institutes for Health Research (CIHR #119288). TK acknowledges this work was funded by the  
605 German Research Foundation (DFG grants FOR2107 KI588/14-1, and KI588/14-2, and KI588/20-1,  
606 KI588/22-1 to Tilo Kircher, Marburg, Germany). Biosamples and corresponding data were sampled,  
607 processed and stored in the Marburg Biobank CBBMR. This work was funded by the German Research  
608 Foundation (DFG grants KR 3822/5-1, KR 3822/7-2 to Axel Krug). ETCL s funded in part by the American  
609 Foundation for Suicide Prevention SRG-0-112-20. CLJ is supported by PRISMA U.T. AMM is supported by  
610 the Wellcome Trust Grants (220857/Z/20/Z, 226770/Z/22/Z, 104036/Z/14/Z, 216767/Z/19/Z), and the  
611 European Union Horizon 2020 Grant (Grant Agreement 847776). KAM acknowledges this study was funded  
612 by the National Institute of Mental Health (R01-MH103291). PBM acknowledges this study was funded by  
613 the Australian National Medical and Health Research Council (Program Grant 1037196 (PBM and MB);  
614 Investigator Grant 1177991 (PBM)), the Lansdowne Foundation, Good Talk, and the Keith Pettigrew Family

615 Bequest (PBM). IN work is funded by the Deutsche Forschungsgemeinschaft (DFG) grants NE2254/1-2,  
616 NE2254/2-1, NE2254/3-1, NE2254/4-1. PMP acknowledges BHRCS was supported with grants from the  
617 National Institute of Development Psychiatric for Children and Adolescent (INPD) and the Grant Fapesp  
618 2014/50917-0 - 2021/05332-8 CNPq 465550/2014-2. FP acknowledges support for the team in Nimes,  
619 CINES grants access to HPC facilities (A0100311413). FaP is supported by the Italian Ministry of Health,  
620 grant RF-2019-12370182. FeP is supported by the Italian Ministry of Health, grant Ricerca Corrente RC 23.  
621 SP is supported by the Italian Ministry of Health, grant PNRR-MAD-2022-12375716, RF-2018-12367249. GR  
622 acknowledges this study was funded by the Australian National Medical and Health Research Council  
623 (Program Grant 1037196 (PBM and MB); Investigator Grant 1177991 (PBM)), the Lansdowne Foundation,  
624 Good Talk, and the Keith Pettigrew Family Bequest (PBM). RRG was supported by EMERGIA Junta de  
625 Andalucía program (EMERGIA20\_00139), the VII Plan Propio of the University of Seville, the Plan de  
626 Consolidación (CNS2023-143647) and the Proyectos de Generación de Conocimiento (PID2021-122853OA-  
627 I00) from the Spanish Ministry of Science and Innovation. MDS is supported by the National Institute of  
628 Mental Health (Project Number R01MH125850); Brain and Behavior Research Foundation (Grant Number  
629 28972). HRS was supported by a grant from the National Institutes of Health in the United States  
630 (DA051018). JCS acknowledges this work was partially supported by NIMH (1R01MH085667-01A1), John S.  
631 Dunn Foundation (Houston, Texas), and Pat Rutherford Chair in Psychiatry (UTHealth Houston). GS is  
632 supported by the Italian Ministry of Health, grant Ricerca Corrente RC 23. JDS is supported by the grants  
633 MRC (MR/S010351/1, MR/W002388/1, MR/W002566/1) and EPSRC (EP/Y017544/1). The DCHS cohort is  
634 funded by the Bill & Melinda Gates Foundation [INV-006732]. DJS is funded by the South African Medical  
635 Research Council. BS acknowledges this work was funded by the German Research Foundation (DFG grant  
636 as part of FOR2107: STR1146/18-1 to Benjamin Straube, Marburg, Germany). MW is supported by German  
637 Center for Mental Health (DZPG); FKZ: 01EE2103; and NeuroMarKet: Neuroimaging and Blood Markers as  
638 Indicators of Ketamine Efficacy in Treatment Resistant Depression; BMBF-EU-EraNet-Neuron, FKZ:  
639 01EW2010A. HCW acknowledges this work is supported by the Chief Scientist Office of the Scottish  
640 Government Health Directorates [CZD/16/6], Scottish Funding Council [HR03006], Wellcome Trust  
641 [216767/Z/19/Z] & Wellcome Trust (Wellcome Trust Strategic Award “Stratifying Resilience and Depression  
642 Longitudinally” (STRADL) Reference 104036/Z/14/Z). CAZ is supported by the National Institute of Mental  
643 Health Intramural Research Program (ZIA MH002857). TTY is supported by the National Center for  
644 Complementary and Integrative Health (NCCIH) R21AT009173, R61AT009864, and R33AT009864 to TTY;  
645 by the National Center for Advancing Translational Sciences (CTSI), National Institutes of Health, through  
646 UCSF-CTSI UL1TR001872 to TTY; by the American Foundation for Suicide Prevention (AFSP) SRG-1-141-  
647 18 to TTY; by UCSF Weill Institute for Neurosciences to TTY; by UCSF Research Evaluation and Allocation  
648 Committee (REAC) and J. Jacobson Fund to TTY; by the National Institute of Mental Health (NIMH)  
649 R01MH085734 and the Brain and Behavior Research Foundation (formerly NARSAD) to TTY. PMT is  
650 supported by NIH grants R01AG058854, R01MH116147 and R01MH129742. NJ is supported by  
651 R01MH134004. MER receives Fellowship support from the Rebecca L Cooper Medical Research  
652 Foundation (F20231230).

### 653 654 **Conflicts of interest**

655 ALvH receives consultancy fees from the Augeo foundation. CAZ is a full-time US government employee.  
656 He is listed as a co-inventor on a patent for the use of ketamine and its metabolites in major depression and  
657 suicidal ideation. Dr. Zarate has assigned his patent rights to the U.S. government but will share a  
658 percentage of any royalties that may be received by the government. HPB has consulted to the Milken  
659 Institute. MW is a member of the following advisory boards and gave presentations to the following  
660 companies: Bayer AG, Germany; Boehringer Ingelheim, Germany; and Biologische Heilmittel Heel GmbH,  
661 Germany. MW has further conducted studies with institutional research support from HEEL and Janssen  
662 Pharmaceutical Research for a clinical trial (IIT) on ketamine in patients with MDD, unrelated to this  
663 investigation. MW did not receive any financial compensation from the companies mentioned above. IA  
664 received speakers honorarium from Lundbeck. IBH is the Co-Director, Health and Policy at the Brain and  
665 Mind Centre (BMC) University of Sydney. The BMC operates an early-intervention youth services at  
666 Camperdown under contract to headspace. He is the Chief Scientific Advisor to, and a 3.2% equity  
667 shareholder in, InnoWell Pty Ltd which aims to transform mental health services through the use of  
668 innovative technologies. AC reports being currently an employee of the Regeneron Genetics Center, and  
669 may own Regeneron stock or stock options. JCS acknowledge to be related with the next companies

670 ALKERMES (Advisory Board), BOEHRINGER Ingelheim (Consultant), COMPASS Pathways (Research  
671 Grant), JOHNSON & JOHNSON (Consultant), LIVANOVA (Consultant), RELMADA (Research Grant),  
672 SUNOVION (Research Grant), Mind Med (Research Grant). PMP received payment or honoraria for lectures  
673 and presentations in educational events for Sandoz, Daiichi Sankyo, Eurofarma, Abbot, Libbs, Instituto  
674 Israelita de Pesquisa e Ensino Albert Einstein, Instituto D'Or de Pesquisa e Ensino. All other authors report  
675 no biomedical financial interests, disclosures or potential conflicts of interest.  
676

677

678

679

680

681

682

683

684

685

686

687

688

689

690

691

692

693

694

695

696

697

698

699

700

701

## 702 References

- 703 1. WHO. Suicide worldwide in 2019: global health estimates. 2021. 2021.
- 704 2. Martínez-Alés G, Jiang T, Keyes KM, Gradus JL. The Recent Rise of Suicide Mortality in the  
705 United States. *Annu Rev Public Health*. 2022;43:99–116.
- 706 3. Wasserman D, Carli V, Iosue M, Javed A, Herrman H. Suicide prevention in childhood and  
707 adolescence: a narrative review of current knowledge on risk and protective factors and  
708 effectiveness of interventions. *Asia Pac Psychiatry*. 2021;13:e12452.
- 709 4. Schmaal L, van Harmelen A-L, Chatzi V, Lippard ETC, Toenders YJ, Averill LA, et al. Imaging  
710 suicidal thoughts and behaviors: a comprehensive review of 2 decades of neuroimaging  
711 studies. *Mol Psychiatry*. 2020;25:408–427.
- 712 5. Auerbach RP, Pagliaccio D, Allison GO, Alqueza KL, Alonso MF. Neural Correlates  
713 Associated With Suicide and Nonsuicidal Self-injury in Youth. *Biol Psychiatry*. 2021;89:119–  
714 133.
- 715 6. van Velzen LS, Dauvermann MR, Colic L, Villa LM, Savage HS, Toenders YJ, et al. Structural  
716 brain alterations associated with suicidal thoughts and behaviors in young people: results from  
717 21 international studies from the ENIGMA Suicidal Thoughts and Behaviours consortium. *Mol*  
718 *Psychiatry*. 2022:1–11.
- 719 7. Zanghi E, Corallo F, Lo Buono V. Diffusion tensor imaging studies on subjects with suicidal  
720 thoughts and behaviors: A descriptive literature review. *Brain Behav*. 2022;12:e2711.
- 721 8. Podwalski P, Szczygieł K, Tyburski E, Sagan L, Misiak B, Samochowiec J. Magnetic  
722 resonance diffusion tensor imaging in psychiatry: a narrative review of its potential role in  
723 diagnosis. *Pharmacol Rep*. 2021;73:43–56.
- 724 9. Jones DK, Knösche TR, Turner R. White matter integrity, fiber count, and other fallacies: the  
725 do's and don'ts of diffusion MRI. *Neuroimage*. 2013;73:239–254.
- 726 10. Olvet DM, Peruzzo D, Thapa-Chhetry B, Sublette ME, Sullivan GM, Oquendo MA, et al. A  
727 diffusion tensor imaging study of suicide attempters. *J Psychiatr Res*. 2014;51:60–67.
- 728 11. Lippard ETC, Cox Lippard ET, Johnston JAY, Spencer L, Quatrano S, Fan S, et al.  
729 Preliminary examination of gray and white matter structure and longitudinal structural changes  
730 in frontal systems associated with future suicide attempts in adolescents and young adults  
731 with mood disorders. *Journal of Affective Disorders*. 2019;245:1139–1148.
- 732 12. Mahon K, Burdick KE, Wu J, Ardekani BA, Szeszko PR. Relationship between suicidality and  
733 impulsivity in bipolar I disorder: a diffusion tensor imaging study. *Bipolar Disord*. 2012;14:80–  
734 89.
- 735 13. Gosnell SN, Molfese DL, Salas R. Brain Morphometry: Suicide. In: Spalletta G, Piras F, Gili T,  
736 editors. *Brain Morphometry*, New York, NY: Springer New York; 2018. p. 403–427.
- 737 14. Cyprien F, de Champfleury NM, Deverdun J, Olié E, Le Bars E, Bonafé A, et al. Corpus  
738 callosum integrity is affected by mood disorders and also by the suicide attempt history: A  
739 diffusion tensor imaging study. *J Affect Disord*. 2016;206:115–124.
- 740 15. Lischke A, Domin M, Freyberger HJ, Grabe HJ, Mentel R, Bernheim D, et al. Structural  
741 Alterations in the Corpus Callosum Are Associated with Suicidal Behavior in Women with  
742 Borderline Personality Disorder. *Front Hum Neurosci*. 2017;11:196.
- 743 16. Wei S, Womer FY, Edmiston EK, Zhang R, Jiang X, Wu F, et al. Structural alterations  
744 associated with suicide attempts in major depressive disorder and bipolar disorder: A diffusion  
745 tensor imaging study. *Prog Neuropsychopharmacol Biol Psychiatry*. 2020;98:109827.
- 746 17. Jia Z, Huang X, Wu Q, Zhang T, Lui S, Zhang J, et al. High-field magnetic resonance imaging  
747 of suicidality in patients with major depressive disorder. *Am J Psychiatry*. 2010;167:1381–  
748 1390.
- 749 18. Johnston JAY, Wang F, Liu J, Blond BN, Wallace A, Liu J, et al. Multimodal Neuroimaging of  
750 Frontolimbic Structure and Function Associated With Suicide Attempts in Adolescents and  
751 Young Adults With Bipolar Disorder. *Am J Psychiatry*. 2017;174:667–675.
- 752 19. Kim B, Oh J, Kim M-K, Lee S, Tae WS, Kim CM, et al. White matter alterations are associated  
753 with suicide attempt in patients with panic disorder. *J Affect Disord*. 2015;175:139–146.
- 754 20. Lee S-J, Kim B, Oh D, Kim M-K, Kim K-H, Bang SY, et al. White matter alterations associated  
755 with suicide in patients with schizophrenia or schizophreniform disorder. *Psychiatry Res*  
756 *Neuroimaging*. 2016;248:23–29.
- 757 21. Reis JV, Vieira R, Portugal-Nunes C, Coelho A, Magalhães R, Moreira P, et al. Suicidal



- 758 Ideation Is Associated With Reduced Functional Connectivity and White Matter Integrity in  
759 Drug-Naïve Patients With Major Depression. *Front Psychiatry*. 2022;13:838111.
- 760 22. Zhang R, Jiang X, Chang M, Wei S, Tang Y, Wang F. White matter abnormalities of corpus  
761 callosum in patients with bipolar disorder and suicidal ideation. *Ann Gen Psychiatry*.  
762 2019;18:20.
- 763 23. Fan S, Lippard ETC, Sankar A, Wallace A, Johnston JAY, Wang F, et al. Gray and white  
764 matter differences in adolescents and young adults with prior suicide attempts across bipolar  
765 and major depressive disorders. *J Affect Disord*. 2019;245:1089–1097.
- 766 24. Button KS, Ioannidis JPA, Mokrysz C, Nosek BA, Flint J, Robinson ESJ, et al. Power failure:  
767 why small sample size undermines the reliability of neuroscience. *Nat Rev Neurosci*.  
768 2013;14:365–376.
- 769 25. Winkiewski PJ, Sabisz A, Naumczyk P, Jodzio K, Szurowska E, Szarmach A. Understanding  
770 the Physiopathology Behind Axial and Radial Diffusivity Changes—What Do We Know? *Front*  
771 *Neurol*. 2018;9:92.
- 772 26. Tae WS, Ham BJ, Pyun SB, Kang SH, Kim BJ. Current Clinical Applications of Diffusion-  
773 Tensor Imaging in Neurological Disorders. *J Clin Neurol*. 2018;14:129–140.
- 774 27. Fortin J-P, Cullen N, Sheline YI, Taylor WD, Aselcioglu I, Cook PA, et al. Harmonization of  
775 cortical thickness measurements across scanners and sites. *Neuroimage*. 2018;167:104–120.
- 776 28. Radua J, Vieta E, Shinohara R, Kochunov P, Quidé Y, Green MJ, et al. Increased power by  
777 harmonizing structural MRI site differences with the ComBat batch adjustment method in  
778 ENIGMA. *Neuroimage*. 2020;218:116956.
- 779 29. Kaufman J, Birmaher B, Brent D, Rao U, Flynn C, Moreci P, et al. Schedule for Affective  
780 Disorders and Schizophrenia for School-Age Children—Present and Lifetime Version (K-SADS-  
781 PL): Initial Reliability and Validity Data. *Journal of the American Academy of Child &*  
782 *Adolescent Psychiatry*. 1997;36:980–988.
- 783 30. First MB. Structured clinical interview for DSM-IV Axis I disorders SCID-I: Clinician version,  
784 scoresheet. American Psychiatric Press; 1997.
- 785 31. Posner K, Brent D, Lucas C, Gould M, Stanley B, Brown G, et al. Columbia-suicide severity  
786 rating scale (C-SSRS). New York, NY: Columbia University Medical Center. 2008. 2008.
- 787 32. Nock MK, Holmberg EB, Photos VI, Michel BD. Self-Injurious Thoughts and Behaviors  
788 Interview: development, reliability, and validity in an adolescent sample. *Psychol Assess*.  
789 2007;19:309–317.
- 790 33. Hamilton M. A rating scale for depression. *J Neurol Neurosurg Psychiatry*. 1960;23:56–62.
- 791 34. Beck AT, Ward C, Mendelson M, Mock J, Erbaugh J. Beck depression inventory (BDI). *Arch*  
792 *Gen Psychiatry*. 1961;4:561–571.
- 793 35. Beck AT, Steer RA, Brown GK, Others. Beck depression inventory-II. San Antonio.  
794 1996;78:490–498.
- 795 36. Beck AT, Kovacs M, Weissman A. Assessment of suicidal intention: the Scale for Suicide  
796 Ideation. *J Consult Clin Psychol*. 1979;47:343–352.
- 797 37. Beck AT, Steer RA, Ranieri WF. Scale for suicide ideation: Psychometric properties of a self-  
798 report version. *J Clin Psychol*. 1988;44:499–505.
- 799 38. R core team. R: A language and environment for statistical computing. R Foundation for  
800 Statistical Computing, Vienna, Austria. [Http://www R-Project Org/](http://www.R-Project.Org/). 2013. 2013.
- 801 39. van Velzen LS, Kelly S, Isaev D, Aleman A, Aftanas LI, Bauer J, et al. White matter  
802 disturbances in major depressive disorder: a coordinated analysis across 20 international  
803 cohorts in the ENIGMA MDD working group. *Mol Psychiatry*. 2020;25:1511–1525.
- 804 40. Posner K, Brown GK, Stanley B, Brent DA, Yershova KV, Oquendo MA, et al. The Columbia-  
805 Suicide Severity Rating Scale: initial validity and internal consistency findings from three  
806 multisite studies with adolescents and adults. *Am J Psychiatry*. 2011;168:1266–1277.
- 807 41. Jenkins LM, Barba A, Campbell M, Lamar M, Shankman SA, Leow AD, et al. Shared white  
808 matter alterations across emotional disorders: A voxel-based meta-analysis of fractional  
809 anisotropy. *Neuroimage Clin*. 2016;12:1022–1034.
- 810 42. Chen Z, Cui L, Li M, Jiang L, Deng W, Ma X, et al. Voxel based morphometric and diffusion  
811 tensor imaging analysis in male bipolar patients with first-episode mania. *Prog*  
812 *Neuropsychopharmacol Biol Psychiatry*. 2012;36:231–238.
- 813 43. Leunissen I, Coxon JP, Caeyenberghs K, Michiels K, Sunaert S, Swinnen SP. Task switching  
814 in traumatic brain injury relates to cortico-subcortical integrity. *Hum Brain Mapp*.

- 815 2014;35:2459–2469.
- 816 44. Wallace EJ, Mathias JL, Ward L. The relationship between diffusion tensor imaging findings  
817 and cognitive outcomes following adult traumatic brain injury: A meta-analysis. *Neurosci*  
818 *Biobehav Rev.* 2018;92:93–103.
- 819 45. Jiang X, Guo Y, Jia L, Zhu Y, Sun Q, Kong L, et al. Altered Levels of Plasma Inflammatory  
820 Cytokines and White Matter Integrity in Bipolar Disorder Patients With Suicide Attempts. *Front*  
821 *Psychiatry.* 2022;13:861881.
- 822 46. Colic L, Villa LM, Dauvermann MR, van Velzen LS, Sankar A, Goldman DA, et al. Brain grey  
823 and white matter structural associations with future suicidal ideation and behaviors in  
824 adolescent and young adult females with mood disorders. *JCPP Adv.* 2022;2.
- 825 47. Chaddock-Heyman L, Erickson KI, Voss MW, Powers JP, Knecht AM, Pontifex MB, et al.  
826 White matter microstructure is associated with cognitive control in children. *Biol Psychol.*  
827 2013;94:109–115.
- 828 48. Hu R, Stavish C, Leibenluft E, Linke JO. White Matter Microstructure in Individuals With and At  
829 Risk for Bipolar Disorder: Evidence for an Endophenotype From a Voxel-Based Meta-analysis.  
830 *Biol Psychiatry Cogn Neurosci Neuroimaging.* 2020;5:1104–1113.
- 831 49. Dome P, Rihmer Z, Gonda X. Suicide Risk in Bipolar Disorder: A Brief Review. *Medicina* .  
832 2019;55.
- 833 50. Blaauw J, Meiners LC. The splenium of the corpus callosum: embryology, anatomy, function  
834 and imaging with pathophysiological hypothesis. *Neuroradiology.* 2020;62:563–585.
- 835 51. Clauss J. Extending the neurocircuitry of behavioural inhibition: a role for the bed nucleus of  
836 the stria terminalis in risk for anxiety disorders. *Gen Psychiatr.* 2019;32:e100137.
- 837 52. Harnett NG, Stevens JS, van Rooij SJH, Ely TD, Michopoulos V, Hudak L, et al. Multimodal  
838 structural neuroimaging markers of risk and recovery from posttrauma anhedonia: A  
839 prospective investigation. *Depress Anxiety.* 2021;38:79–88.
- 840 53. Bonanni L, Gualtieri F, Lester D, Falcone G, Nardella A, Fiorillo A, et al. Can Anhedonia Be  
841 Considered a Suicide Risk Factor? A Review of the Literature. *Medicina.* 2019;55:458.
- 842 54. Janelle F, Iorio-Morin C, D'amour S, Fortin D. Superior Longitudinal Fasciculus: A Review of  
843 the Anatomical Descriptions With Functional Correlates. *Front Neurol.* 2022;13:794618.
- 844 55. Davey DK, Jurick SM, Crocker LD, Hoffman SN, Sanderson-Cimino M, Tate DF, et al. White  
845 matter integrity, suicidal ideation, and cognitive dysfunction in combat-exposed Iraq and  
846 Afghanistan Veterans. *Psychiatry Res Neuroimaging.* 2021;317:111389.
- 847 56. Pisner DA, Shumake J, Beevers CG, Schnyer DM. The superior longitudinal fasciculus and its  
848 functional triple-network mechanisms in brooding. *Neuroimage Clin.* 2019;24:101935.
- 849 57. Horwitz AG, Czyz EK, Berona J, King CA. Rumination, Brooding, and Reflection: Prospective  
850 Associations with Suicide Ideation and Suicide Attempts. *Suicide Life Threat Behav.*  
851 2019;49:1085–1093.
- 852 58. Favre P, Pauling M, Stout J, Hozer F, Sarrazin S, Abé C, et al. Widespread white matter  
853 microstructural abnormalities in bipolar disorder: evidence from mega- and meta-analyses  
854 across 3033 individuals. *Neuropsychopharmacology.* 2019;44:2285–2293.
- 855 59. Kelly S, Jahanshad N, Zalesky A, Kochunov P, Agartz I, Alloza C, et al. Widespread white  
856 matter microstructural differences in schizophrenia across 4322 individuals: results from the  
857 ENIGMA Schizophrenia DTI Working Group. *Mol Psychiatry.* 2018;23:1261–1269.
- 858 60. Kochunov P, Jahanshad N, Marcus D, Winkler A, Sprooten E, Nichols TE, et al. Heritability of  
859 fractional anisotropy in human white matter: a comparison of Human Connectome Project and  
860 ENIGMA-DTI data. *Neuroimage.* 2015;111:300–311.
- 861 61. DiPoce J, Guelfguat M, DiPoce J. Radiologic findings in cases of attempted suicide and other  
862 self-injurious behavior. *Radiographics.* 2012;32:2005–2024.
- 863 62. Correia MM, Carpenter TA, Williams GB. Looking for the optimal DTI acquisition scheme given  
864 a maximum scan time: are more b-values a waste of time? *Magn Reson Imaging.*  
865 2009;27:163–175.

866  
867  
868  
869  
870



871 **ENIGMA Suicidal Thoughts and Behaviours Consortium**

872

873 Laura S. van Velzen<sup>1,2</sup>, Lejla Colic<sup>3,4,5</sup>, Zuriel Ceja<sup>6,7</sup>, Maria R. Dauvermann<sup>8,9</sup>, Luca M. Villa<sup>3</sup>,  
874 Hannah S. Savage<sup>2,10</sup>, Yara J. Toenders<sup>1,2,11</sup>, Niousha Dehestani<sup>10,12</sup>, Alyssa H. Zhu<sup>13</sup>, Adrian I.  
875 Campos<sup>14</sup>, Lauren E. Salminen<sup>13</sup>, Ingrid Agartz<sup>15,16,17</sup>, Nina Alexander<sup>18,50</sup>, Rosa Ayesa-Arriola<sup>19</sup>,  
876 Elizabeth D. Ballard<sup>20</sup>, Nerisa Banaj<sup>21</sup>, Carlotta Barkhau<sup>22</sup>, Zeynep Başgöze<sup>24</sup>, Jochen Bauer<sup>23</sup>,  
877 Francesco Benedetti<sup>25</sup>, Klaus Berger<sup>26</sup>, Bianca Besteher<sup>4,5</sup>, Katharina Brosch<sup>18,50,86</sup>, Manuel Canal-  
878 Rivero<sup>27,28</sup>, Simon Cervenka<sup>17,29</sup>, Romain Colle<sup>30</sup>, Colm G. Connolly<sup>31</sup>, Emmanuelle Corruble<sup>30</sup>,  
879 Philippe Courtet<sup>32,33</sup>, Baptiste Couvy-Duchesne<sup>34,35</sup>, Benedicto Crespo-Facorro<sup>27,28,36</sup>, Kathryn R  
880 Cullen<sup>24</sup>, Udo Dannlowski<sup>22</sup>, Jeremy Deverdun<sup>37,38</sup>, Ana M. Diaz-Zuluaga<sup>87,88</sup>, Lorielle M.F. Dietze<sup>39</sup>,  
881 Jennifer W Evans<sup>20</sup>, Negar Fani<sup>40</sup>, Kira Flinkenflügel<sup>22</sup>, Naomi P. Friedman<sup>41</sup>, Ian H. Gotlib<sup>42</sup>, Nynke  
882 A. Groenewold<sup>43</sup>, Dominik Grotegerd<sup>22</sup>, Tomas Hajek<sup>39</sup>, Alexander S. Hatoum<sup>44</sup>, Marco  
883 Hermesdorf<sup>26</sup>, Ian B. Hickie<sup>89</sup>, Yoshiyuki Hirano<sup>90,91</sup>, Tiffany C. Ho<sup>92,93</sup>, Yuki Ikemizu<sup>90,94</sup>, Frank  
884 Iorfino<sup>89</sup>, Jonathan C. Ipser<sup>43</sup>, Yuko Isobe<sup>90,91</sup>, Andrea P. Jackowski<sup>45,46</sup>, Fabrice Jollant<sup>47,48,49,30</sup>, Tilo  
885 Kircher<sup>18,50</sup>, Melissa Klug<sup>22</sup>, Sheri-Michelle Koopowitz<sup>43</sup>, Anna Kraus<sup>22</sup>, Axel Krug<sup>18,51</sup>, Emmanuelle  
886 Le Bars<sup>37,38</sup>, Elisabeth J. Leehr<sup>22</sup>, Meng Li<sup>4,5</sup>, Elizabeth T.C. Lippard<sup>52,53</sup>, Carlos Lopez-Jaramillo<sup>88</sup>,  
887 Ivan I. Maximov<sup>15,54</sup>, Andrew M. McIntosh<sup>55</sup>, Katie A. McLaughlin<sup>56,57</sup>, Sean R. McWhinney<sup>39</sup>,  
888 Susanne Meinert<sup>22,58</sup>, Elisa Melloni<sup>25</sup>, Philip B. Mitchell<sup>59</sup>, Benson Mwangi<sup>60,95</sup>, Igor Nenadić<sup>18,50</sup>,  
889 Stener Nerland<sup>15,16</sup>, Emilie Olie<sup>32,33</sup>, Victor Ortiz-García de la Foz<sup>19</sup>, Pedro M. Pan<sup>46</sup>, Fabricio  
890 Pereira<sup>61,62</sup>, Fabrizio Piras<sup>21</sup>, Federica Piras<sup>21</sup>, Sara Poletti<sup>25</sup>, Andrew E. Reineberg<sup>63</sup>, Gloria  
891 Roberts<sup>59</sup>, Rafael Romero-García<sup>9,27</sup>, Matthew D. Sacchet<sup>64</sup>, Giovanni A. Salum<sup>65,66</sup>, Anca-Larisa  
892 Sandu<sup>67</sup>, Carl M. Sellgren<sup>17,68</sup>, Eiji Shimizu<sup>90,91,94</sup>, Harry R. Smolker<sup>69</sup>, Jair C. Soares<sup>60,95</sup>,  
893 Gianfranco Spalletta<sup>21,70</sup>, J. Douglas Steele<sup>71</sup>, Frederike Stein<sup>18,50</sup>, Dan J. Stein<sup>72</sup>, Benjamin  
894 Straube<sup>18,50</sup>, Lea Teutenberg<sup>18,50</sup>, Florian Thomas-Odenthal<sup>18,50</sup>, Paula Usemann<sup>18,50</sup>, Romain  
895 Valabregue<sup>73,74</sup>, Johanna Valencia-Echeverry<sup>88</sup>, Gerd Wagner<sup>4,75</sup>, Gordon Waiter<sup>67</sup>, Martin  
896 Walter<sup>4,5,76,77</sup>, Heather C. Whalley<sup>55,78</sup>, Mon-Ju Wu<sup>60,95</sup>, Tony T. Yang<sup>79</sup>, Carlos A. Zarate<sup>20</sup>, Andre  
897 Zugman<sup>80</sup>, Giovana B. Zunta-Soares<sup>60,95</sup>, Kees van Heeringen<sup>96</sup>, Sanne J.H. van Rooij<sup>40</sup>, Nic van  
898 der Wee<sup>81,82</sup>, Steven van der Werff<sup>81,82</sup>, Paul M. Thompson<sup>13</sup>, Hilary P. Blumberg<sup>3,83,84</sup>, Anne-Laura  
899 van Harmelen<sup>9,85</sup>, Miguel E. Rentería<sup>6,7</sup>, Neda Jahanshad<sup>13</sup>, Lianne Schmaal<sup>1,2</sup>
